# Supplementary material for: Interactome analysis reveals that lncRNA HULC promotes aerobic glycolysis through LDHA and PKM2
Source: PubMed Central journal article supplement (PMC7308313; doi:10.1038/s41467-020-16966-3), 2020-06-22
Supplement: 41467_2020_16966_MOESM1_ESM.pdf [file 41467_2020_16966_MOESM1_ESM.pdf]

## **Supplementary Information**

Interactome Analysis Reveals that LncRNA HULC Promotes Aerobic Glycolysis through LDHA and PKM2

C. Wang et al.

Contents

Supplementary Figures 1-7

Supplementary Tables 1-6

Supplementary methods

**Supplementary figures**

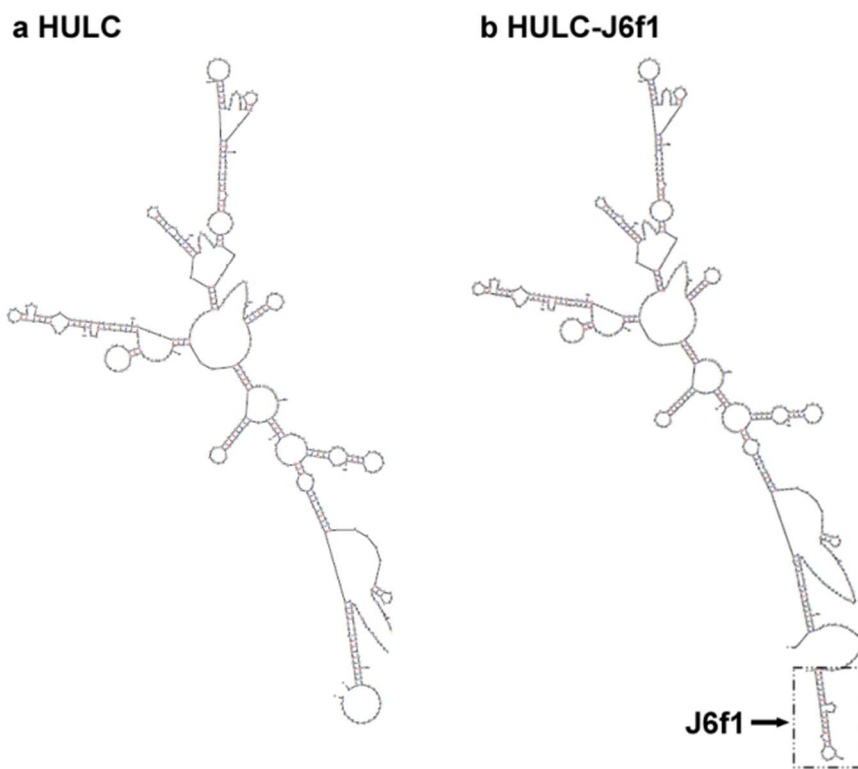

**Supplementary Fig. 1** The secondary structures of HULC and HULC-J6f1. The structures were predicted by MFold (<http://unafold.rna.albany.edu/>).

### a KEGG Pathway

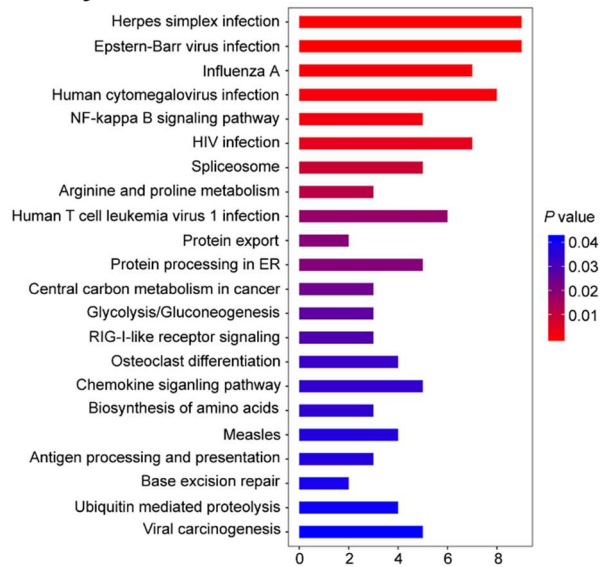

### b Biological Process

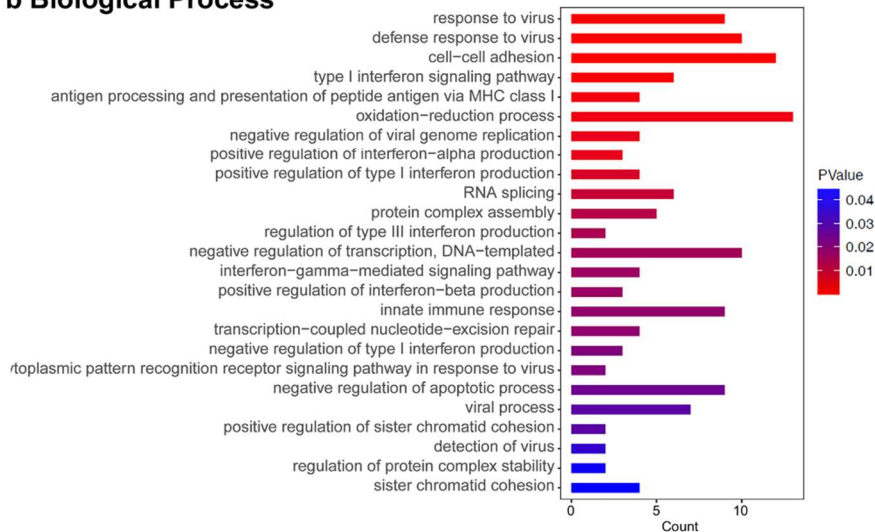

### c Molecular Function

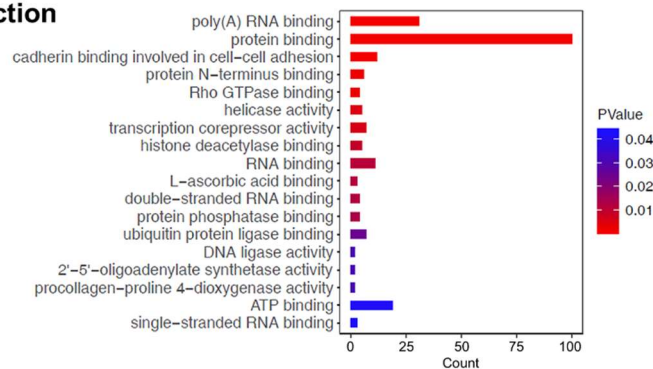

**Supplementary Fig. 2** Functional analysis of the HULC interacting proteins. **a.** KEGG pathway analysis of the identified HULC interacting proteins. The analysis was performed by using DAVID (<https://david.ncifcrf.gov/>). Gene ontology analysis of HULC interacting proteins, including biological process (**b**) and molecular function (**c**).

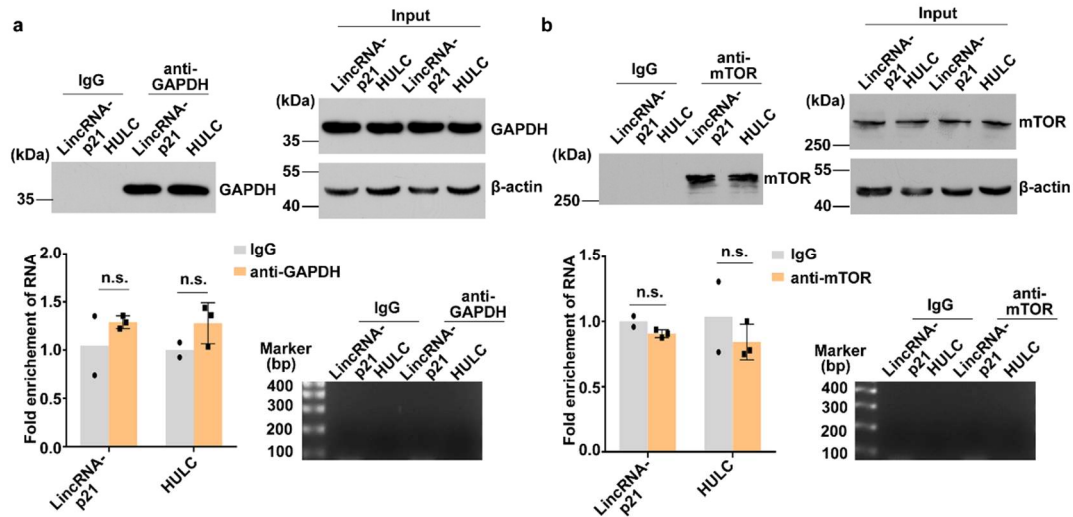

**Supplementary Fig. 3** HULC was not enriched in the immunoprecipitates of GAPDH (**a**) and mTOR (**b**). Immunoblots of the target proteins in the cell lysates and immunoprecipitates are shown in the upper panels. The results of qRT-PCR analysis of HULC are shown in the lower panels. LincRNA-p21 was used as a negative lncRNA control. Triplicate independent experiments were performed (note: some values were missing because of the extremely low RNA concentration). Data represent the mean  $\pm$  s.d. (n.s., not significant, by two-sided Student's *t*-test). Source data are provided as a Source Data file.

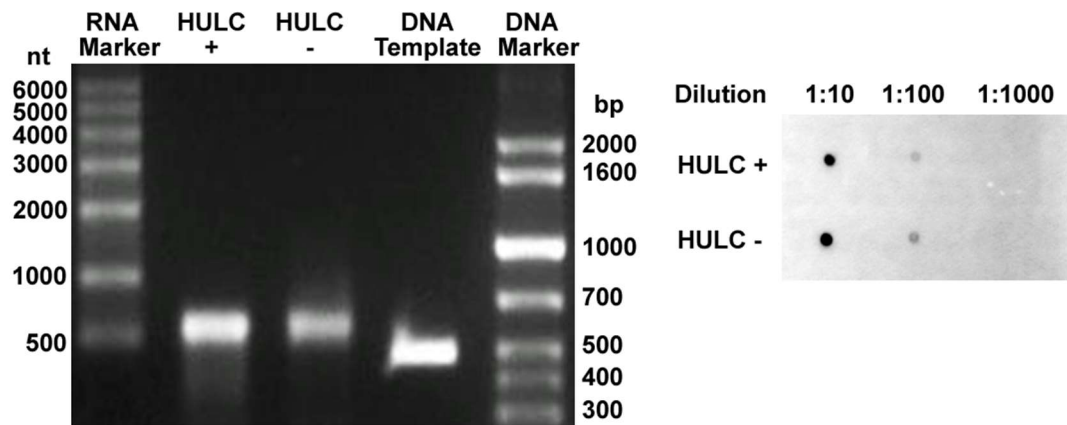

**Supplementary Fig. 4** *In vitro* transcription of HULC. Biotinylated HULC and antisense-HULC was synthesized by *in vitro* transcription and examined by agarose gel electrophoresis and streptavidin dot-blot. Source data are provided as a Source Data file.

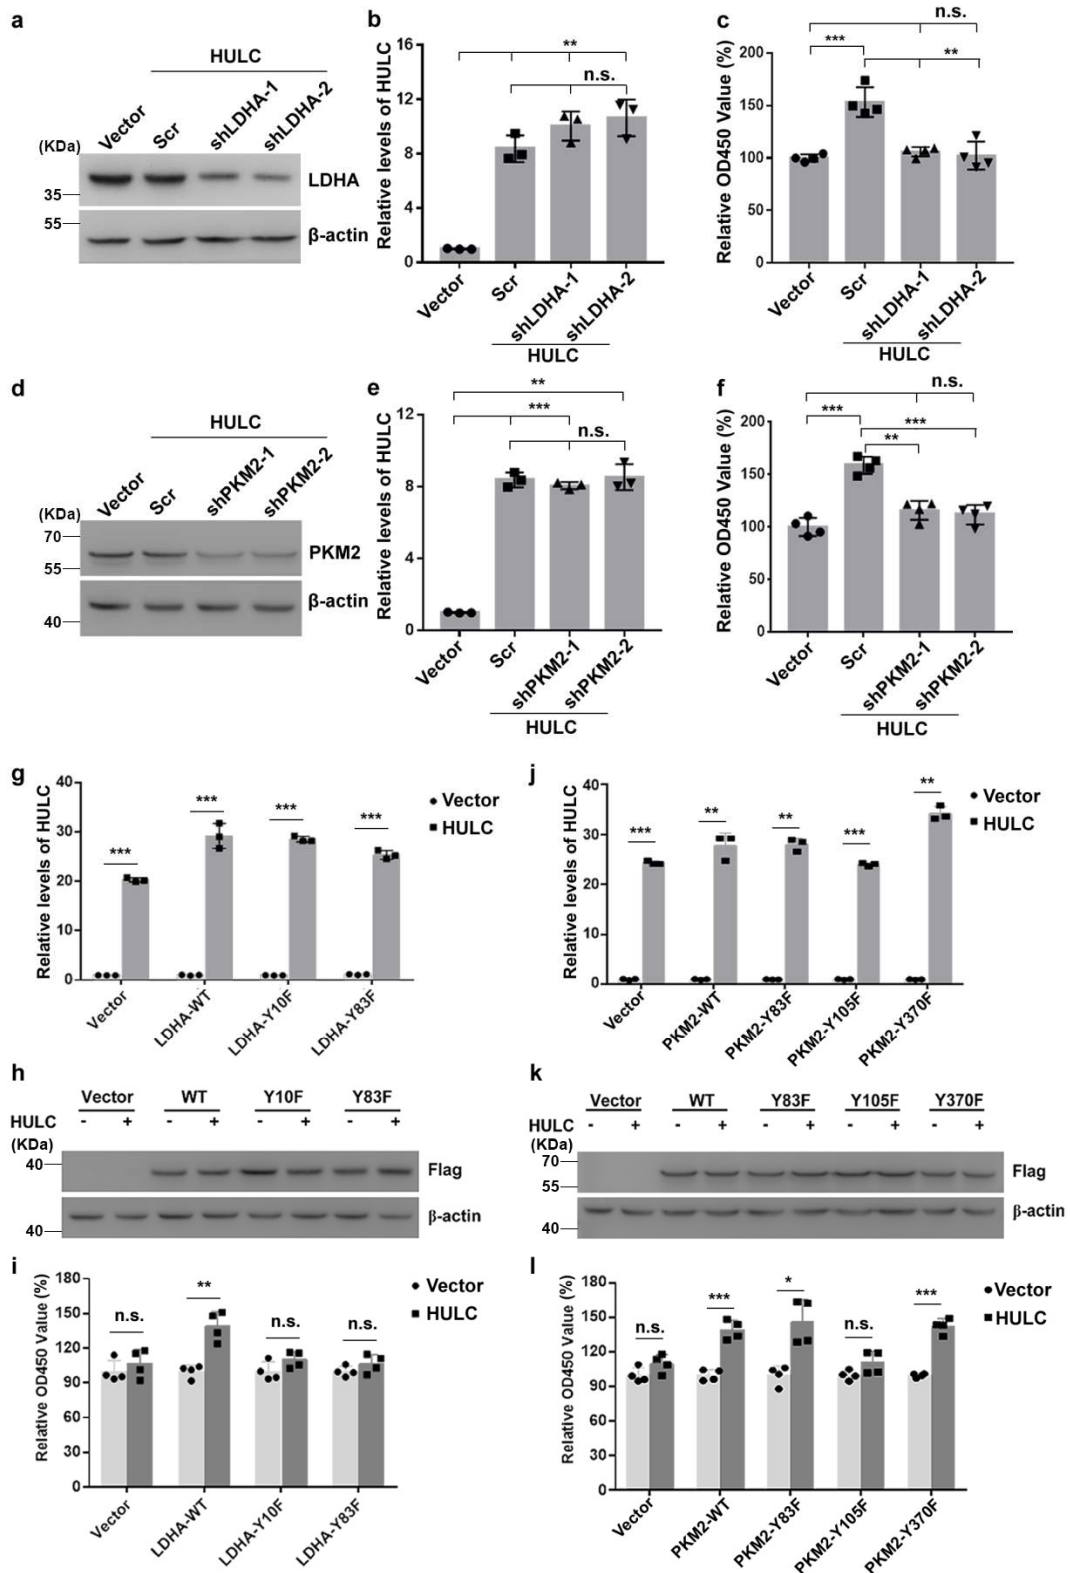

**Supplementary Fig. 5** Phosphorylation sites on LDHA and PKM2 responsible for HULC function. **a**, The knockdown of LDHA was validated by Western blotting. **b**, Relative levels of HULC were measured by qRT-PCR. Triplicate independent analyses were performed. **c**, The proliferation of HepG2-HULC cells treated with

shRNAs targeting LDHA was measured by CCK8 assay and compared with the control cells. Four independent experiments were performed. **d**, The knockdown of PKM2 was validated by Western blotting. **e**, Relative levels of HULC were measured by qRT-PCR. Triplicate independent analyses were performed. **f**, The proliferation of HepG2-HULC cells treated with shRNAs targeting PKM2 was measured by CCK8. Four independent experiments were performed. **g**, Relative levels of HULC in HepG2 cells transfected with vector, LDHA-WT, or LDHA phosphorylation mutants, were measured by qRT-PCR. Triplicate independent analyses were performed. **h**, The expression of wild type (WT) LDHA, LDHA-Y10F, and LDHA-Y83F, was measured by Western blotting using anti-Flag antibody. **i**, The proliferation of HepG2 cells expressing LDHA-WT or LDHA phosphorylation mutants was measured by CCK8 assay. Four independent experiments were performed. **j**, Relative levels of HULC in HepG2 cells transfected with vector, PKM2-WT, or PKM2 phosphorylation mutants, were measured by qRT-PCR. Triplicate independent analyses were performed. **k**, The expression of PKM2-WT, PKM2-Y83F, PKM2-Y105F, and PKM2-Y370F, was measured by Western blotting using anti-Flag antibody. **l**, The proliferation of HepG2 cells expressing PKM2-WT or PKM2 phosphorylation mutants was measured by CCK8 assay. Four independent experiments were performed. Statistical analysis was performed by two-sided Student's *t*-test. Data represent mean  $\pm$  s.d. (\* $P < 0.05$ , \*\* $P < 0.01$ , \*\*\* $P < 0.001$ , n.s., not significant). Source data are provided as a Source Data file.

### 97L with HULC overexpression

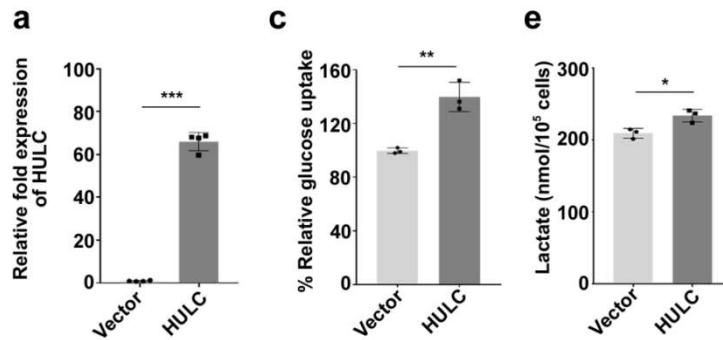

### Huh7 with HULC knockdown

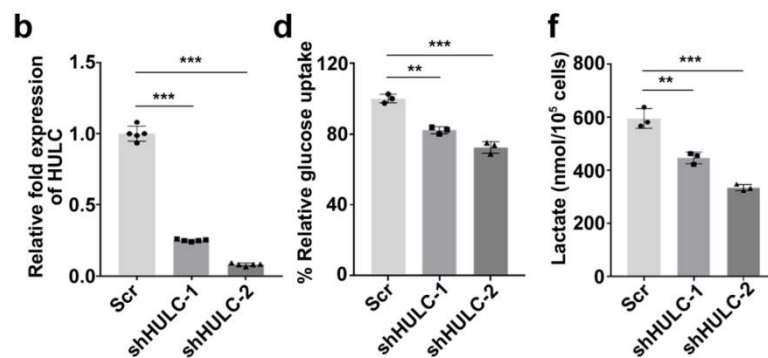

**Supplementary Fig. 6** HULC promotes glycolysis in different HCC cell lines. qRT-PCR analysis of HULC in the 97L cells overexpressing HULC (a) and Huh7 cells with HULC knockdown (b) as compared with corresponding controls. Relative glucose uptake (c, d) and lactate production (e, f) were measured and compared with the control cells, respectively. Data represent the mean  $\pm$  s.d. of triplicate independent analyses ( $*P < 0.05$ ,  $**P < 0.01$ ,  $***P < 0.001$ , by two-sided Student's *t*-test). Source data are provided as a Source Data file.



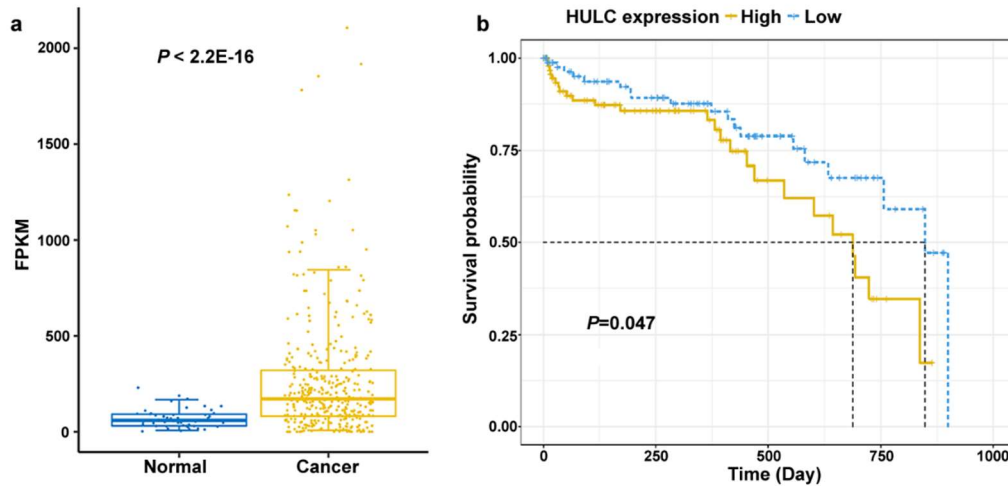

**Supplementary Fig. 7** HULC expression in HCC clinical samples. **a**, HULC expression was significantly up-regulated in HCC tumor samples (n= 371) as compared with the adjacent non-tumorous tissues (n = 50). FPKM, fragments per kilobase of exon model per million reads mapped. The data were analyzed by two-sided Student's *t*-test. The box plot includes data between the 25<sup>th</sup> and 75<sup>th</sup> percentiles, with the horizontal line representing the median. The upper whisker is the 95<sup>th</sup> percentile and the lower whisker is the 5<sup>th</sup> percentile. **b**, Survival rate analysis of the early stage HCC samples with differential HULC expressions (T1, n=129; T2, n=76). The data were downloaded from TCGA database by R package TCGAbiolinks (version 2.10.5), and the analysis was conducted by R package survival (version 2.43.3).

## Supplementary Tables

Supplementary Table 1. Anti-sense DNA probes used in RAP-MS experiment.

| Probe            | 5'-3' sequence                                     |
|------------------|----------------------------------------------------|
| Negative control |                                                    |
| LacZ-1           | TTTCCCAGTCACGACGTTGTAAAACGACGGCCAGTGAATCCGTAATCATG |
| LacZ-2           | AGTGGCAACATGGAAATCGCTGATTTGTGTAGTCGGTTTATGCAGCAACG |
| LacZ-3           | AGTGCAGGAGCTCGTTATCGCTATGACGGAACAGGTATTCGCTGGTCACT |
| Anti-HULC        |                                                    |
| HULC-1           | TCTTCATTCCCTTGTAAGGCTCCAATTCCATCATGAGTTCCACCCCAT   |
| HULC-2           | CAGATTGGGGCCTTGCTGTATCCTCACGTGGCATAAAGAGAGCTCTTGTC |
| HULC-3           | GATCAGAGTTCCTGCATGGTCTGGTTCTCGTGACGACTCTTCCTGGCTTG |
| HULC-4           | TTAATGTTTTAAACAAAGAATATTCCGGCCTTTACTTCAGAGTTTCTTCC |
| HULC-5           | TAGTTTATTGCCAGGAAACTTCTTGCTTGATGCTTTGGTCTGTTTTGTTT |
| HULC-6           | CCAATTTTTTTCTTTGATAACAACATAATTCAGGGAGAAAGTACAAATTT |
| HULC-7           | TAGTTTTGTTTAATTCTAGTTTCAGTTTTGATGATATTTGCCATGCTTC  |

Supplementary Table 2. The list of HULC interacting proteins identified by RAP-MS.

| Protein IDs | Gene symbol | Unique peptides | Mol. weight [kDa] | Sequence length | Log <sub>10</sub> (fold change) | <i>P</i> value |
|-------------|-------------|-----------------|-------------------|-----------------|---------------------------------|----------------|
| P11142      | HSP7C       | 12              | 70.897            | 646             | 1.24                            | 0.033          |
| P00338      | LDHA*       | 5               | 36.688            | 332             | 7.71                            | 0.03           |
| P26599      | PTBP1       | 5               | 57.221            | 531             | 6.947                           | 0.042          |
| P78371      | TCPB        | 5               | 57.488            | 535             | 7.25                            | 0.039          |
| P14625      | ENPL        | 4               | 92.468            | 803             | 0.8                             | 8.39E-05       |
| P30101      | PDIA3*      | 4               | 56.782            | 505             | 7.5                             | 0.001          |
| P38646      | GRP75       | 4               | 73.68             | 679             | 7.521                           | 0.029          |
| O75534      | CSDE1       | 3               | 88.884            | 798             | 6.66                            | 0.018          |
| P07195      | LDHB        | 3               | 36.638            | 334             | 6.72                            | 5.57E-06       |
| P12532      | KCRU        | 3               | 47.036            | 417             | 7.5                             | 0.037          |
| P12956      | XRCC6       | 3               | 69.842            | 609             | 6.76                            | 0.001          |
| Q14204      | DYHC1       | 3               | 532.4             | 4646            | 6.82                            | 0.011          |
| Q99878      | H2A*        | 3               | 13.936            | 128             | 0.73                            | 3.62E-04       |
| P07741      | APT         | 2               | 19.608            | 180             | 6.69                            | 0.002          |
| P12273      | PIP         | 2               | 16.572            | 146             | 0.81                            | 0.017          |
| P21980      | TGM2*       | 2               | 77.328            | 687             | 7.87                            | 0.004          |
| P34897      | GLYM        | 2               | 55.992            | 504             | 6.61                            | 0.017          |
| P62081      | RS7         | 2               | 22.127            | 194             | 6.63                            | 8.65E-07       |
| Q08945      | SSRP1       | 2               | 81.074            | 709             | 6.19                            | 0.049          |
| Q13148      | TADBP       | 2               | 44.739            | 414             | 6.43                            | 0.042          |
| Q15233      | NONO        | 2               | 54.231            | 471             | 7.14                            | 0.027          |
| Q7KZF4      | SND1        | 2               | 102               | 910             | 6.2                             | 0.042          |
| Q8NBS9      | TXND5       | 2               | 47.628            | 432             | 6.49                            | 0.003          |
| Q92597      | NDRG1       | 2               | 42.835            | 394             | 6.59                            | 0.027          |
| Q92734      | TFG         | 2               | 43.447            | 400             | 6.15                            | 0.027          |

Note: \*proteins also observed in the TOBAP-MS experiment. Statistical analysis was

performed by two-sided Student's *t*-test.

Supplementary Table 3. Sequences of the DNA primers used for plasmid

construction.

| Name              | Sequence (5'-3')                                                                 |
|-------------------|----------------------------------------------------------------------------------|
| <i>PKM-exon10</i> | Forward: CCGGAATTCATTGCCCGTGAGGCAGAG<br>Reverse: CCGCTCGAGCTGCCAGACTTGGTGAGGAC   |
| <i>PKM-exon9</i>  | Forward: CCGGAATTCATAGCTCGTGAGGCTGAGGC<br>Reverse: CCGCTCGAGCTGCCAGACTCCGTCAGAAC |
| <i>LDHA</i>       | Forward: CAGTACATCAAGTGTATCATATG<br>Reverse: ATTGCAGCTCCTTTTGGATCC               |
| <i>LDHA-Y10F</i>  | Forward: GGATCAGCTGATTTTAAATCTTC<br>Reverse: GAAGATTAAAAATCAGCTGATCC             |
| <i>LDHA-Y83F</i>  | Forward: GGCAAAGACTTTAATGTAAGT<br>Reverse: CAGTTACATTAAAGTCTTTGCC                |
| <i>PKM2</i>       | Forward: CAGTACATCAAGTGTATCATATG<br>Reverse: GGTCTTTGTAGTCCAT GATATC             |
| <i>PKM2-Y83F</i>  | Forward: ACTCATGAGTTCCATGCGGA<br>Reverse: TCCGCATGGAAGTCCATGAGT                  |
| <i>PKM2-Y105F</i> | Forward: CATCCTCTTCCGGCCCGTT<br>Reverse: AACGGGCCGGAAGAGGATG                     |
| <i>PKM2-Y370F</i> | Forward: GGACTTTCCTCTGGAG GCT<br>Reverse: AGCCTCCAGAGGAAAGTCC                    |

Supplementary Table 4. Interfering sequences used in knockdown experiments.

| Name              | Sequence (5'-3')                                    |
|-------------------|-----------------------------------------------------|
| shHULC-1          | AATCTGCAAGCCAGGAAGAGT                               |
| shHULC-2          | AACCTCCAGAACTGTGATCCA                               |
| shLDHA-1          | GGACTTGGCAGATGAACTTGCCGAAGCAAGT<br>TCATCTGCCAAGTCC  |
| shLDHA-2          | GCTGGGAGTTCACCCATTAAGCGAACTTAATG<br>GGTGA ACTCCCAGC |
| shLDHA (UTR)      | GAGATCTTGTCCTCTGGAAGCCGAAGCTTCCA<br>GAGGACAAGATCTC  |
| shPKM2-1          | GGTGACAGCTTCCTTTCCTGTCTG                            |
| shPKM2-2          | GGGCTGTTGTTCCATTGAAGCC                              |
| Scramble sequence | TCCTAAGGTTAAGTCGCCCTC                               |

Supplementary Table 5. Sequences of the DNA primers for qRT-PCR.

---

| Name        | Sequence (5'-3')                                                      |
|-------------|-----------------------------------------------------------------------|
| HULC        | Forward: ACTCTGAAGTAAAGGCCGGAA<br>Reverse: TTTGCCACAGGTTGAACACTT      |
| lincRNA-p21 | Forward: GGAGACTCTCAGGGTCGAAA<br>Reverse: TTAGGGCTTCCTCTTGGAGA        |
| 18S rRNA    | Forward: GCTTAATTTGACTCAACACGGGA<br>Reverse: AGCTATCAATCTGTCAATCCTGTC |

---

Supplementary Table 6. Primer sequences for the sense and antisense *HULC-J6f1* and *HULC* used in the *in vitro* transcription.

| Name                          | Sequence (5'-3')                                                   |
|-------------------------------|--------------------------------------------------------------------|
| <i>HULC-J6f1</i>              | Forward: TAATACGACTCACTATAGGG                                      |
|                               | ATGGGGGTGGAACATCATGATG                                             |
|                               | Reverse: GGCTCAGCACGAGTGTAGCTAAAC                                  |
| Antisense<br><i>HULC-J6f1</i> | Forward: ATGGGGGTGGAACATCATGAT                                     |
|                               | Reverse:                                                           |
|                               | TAATACGACTCACTATAGGGGGCTCAGCACGAGTGTA<br>GCTAAAC                   |
| Sense<br><i>HULC</i>          | Forward: TAATACGACTCACTATAGGG                                      |
|                               | ATGGGGGTGGAACATCATGATG                                             |
|                               | Reverse: TTTTTTTTTTTTTTTTTTTAAGAATGGAC"<br>antisense chain of HULC |
| Antisense<br><i>HULC</i>      | Forward: ATGGGGGTGGAACATCATGAT                                     |
|                               | Reverse:                                                           |
|                               | AATACGACTCACTATAGGGTTTTTTTTTTTTTTTTTTAA<br>GAATGGAC"               |

## Supplementary Methods

### Identification of endogenous HULC binding proteins by RNA antisense purification and mass spectrometry (RAP-MS)

*Probe Design and Synthesis* - To capture endogenous HULC binding proteins, we designed 5' biotin modified 50-mer DNA oligonucleotides that sequentially covered the sequence of HULC without overlapping. The sequence of each probe was antisense to HULC. To avoid off-target hybridization, we used BLAST to remove sequences that contained a perfect 20 base pair match or an imperfect (90%) 35 base pair match with another transcript or genomic region. Seven probes were selected for HULC, and three probes for *Escherichia coli lacZ* that is absent from human cells was used as negative control (Supplementary Table S1).

*UV crosslinking and cell lysate preparation* - Cells were washed twice with ice-cold PBS. UV-crosslinking was performed on ice with 800mJ/cm<sup>2</sup> at 254nm wavelength in a UV crosslinker. Cells were then scraped off from culture dishes, pelleted by centrifugation at 1,500g for 5min, flash frozen in liquid nitrogen and stored at -80°C. Cells were lysed by ice cold cell lysis buffer (10 mM Tris pH 7.5, 500 mM LiCl, 0.5% dodecyl maltoside, 0.2% sodium dodecyl sulphate, 0.1% sodium deoxycholate) supplemented with protease inhibitor cocktail and RNase inhibitor. The cells were passed 3-5 times through a 27-gauge needle attached to a 1mL syringe in order to disrupt the pellet, and sonicated for 20s in intermittent pulses to shear genomic DNA. Next, samples were treated with 2.5 mM MgCl<sub>2</sub>, 0.5 mM CaCl<sub>2</sub>, and 20 U DNase at 37°C for 10 min to digest DNA. Then, the reaction was terminated by 10 mM EDTA and 5 mM TCEP. Equal volume of 2X hybridization buffer (20 mM Tris pH 7.5, 10 mM EDTA, 1 M LiCl, 1% DDM, 0.4% SDS, 0.2% sodium deoxycholate, 8 M urea, 5 mM TCEP) was mixed with the lysate and then incubated on ice for 10min. Lysates were cleared by centrifugation at 16,000g for 10 min and the supernatants were transferred to new tubes.

*Isolation of HULC binding proteins by RAP* – Lysate from 200 million cells was used for each capture. Biotinylated 50-mer DNA oligonucleotide probes (15 µg per capture) were heat-denatured at 85°C for 3 min and then chilled on ice. Probes were mixed with cell lysate and then incubated at 67°C with intermittent shaking (30 s shaking, 30 s off) for 2h to hybridize probes to the target RNA. Hybrids of biotinylated probes and target RNA were bound to streptavidin beads by incubating each sample with 250 µL of washed streptavidin Dynabeads MyOne C1 magnetic beads at 67°C for 30 min. Beads were washed 6 times with 1X hybridization buffer (10 mM Tris pH 7.5, 5 mM EDTA, 500 mM LiCl, 0.5% DDM, 0.2% SDS, 0.1% sodium deoxycholate, 4 M urea, 2.5 mM TCEP) at 67°C. The washed beads were resuspended in RNase A/T1 elution buffer (20 mM Tris pH 7.5, 2 mM MgCl<sub>2</sub>) for subsequent processing of the proteins.

*Protein identification by mass spectrometry* - Elution of captured proteins from



streptavidin beads was achieved by digesting the RNA using RNase A/T1 Mix for 2h at 37°C. Beads were magnetically separated from sample using a magnetic stand and the sample supernatant were transferred to a new tube. Each sample was concentrated by using a 10 kDa ultrafiltration device and resuspended in 6M urea (in 50 mM ammonium bicarbonate buffer). The samples were reduced by incubating with 10mM DTT at room temperature for 1h. The reduced proteins were alkylated for 1h in darkness with 40 mM iodoacetamide. The alkylation reaction was quenched by adding DTT to a final concentration of 50 mM. The urea in the solution was exchanged to 50mM ammonium bicarbonate buffer by centrifugation using 10 kDa ultrafiltration devices. Then, trypsin was added at a 50:1 protein to trypsin mass ratio, and the samples were incubated at 37°C overnight. The digested peptides were analyzed by a Fusion Lumos mass spectrometer as described in the Method section. Three biological replicates were performed, and proteins observed in only one dataset were discarded to ensure the reliability of quantification. Identified proteins with fold change  $_{HULC/lacZ} > 2$  and  $P < 0.05$  (by two-sided Student's *t*-test) were considered as potential HULC binding proteins.
